# Supplementary material
Source: MDPI journal article supplement (https://www.mdpi.com/1999-4907/15/1/15)
Supplement: s1 [file s1]

## Supplementary material

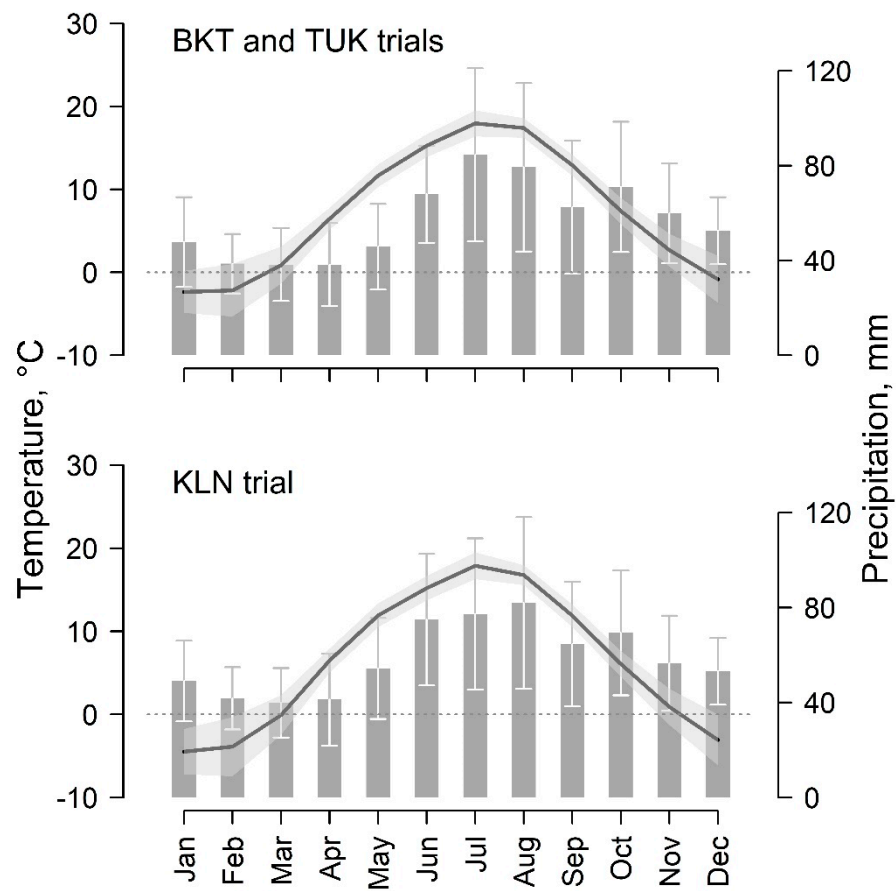

**Figure S1.** Climatic description of the trials. Mean monthly temperature (line) and precipitation (bars) with their standard deviations (whiskers and polygon) for the period 1988–2017 are shown.

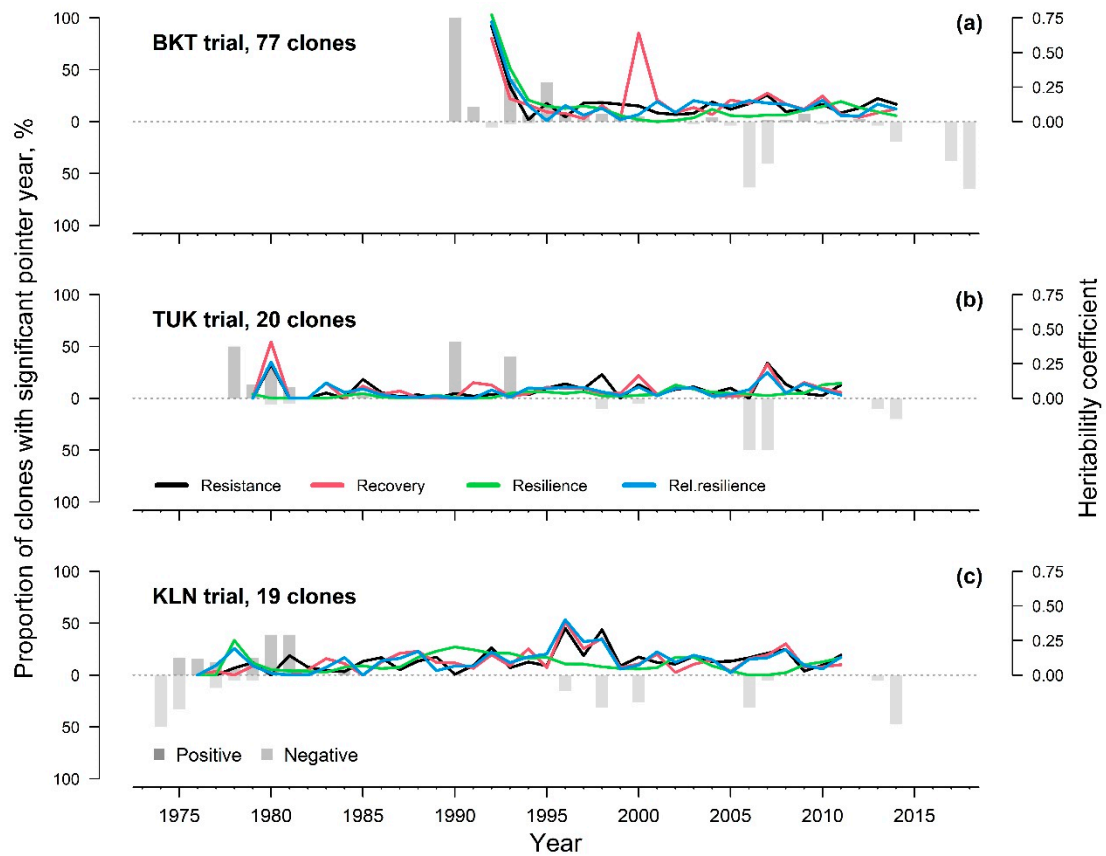

**Figure S2.** The proportion of clones showing “significant” pointer year in TRW in the studied clonal plantations of local plus-trees of Norway spruce in Latvia (bars). Lines indicate broad sense clonal heritability ( $H^2$ ) of the resilience components (resistance, recovery, resilience and relative resilience) of TRW calculated on annual basis. Heritability coefficients are calculated for the periods represented by  $\geq 5$  clones and  $\geq 50$  observations.
